# Supplementary material for: Multi-omics analysis reveals the effects of microbiota on oral homeostasis
Source: Front Immunol. 2022 Sep 20;13:1005992. doi: 10.3389/fimmu.2022.1005992 (PMC9533175; doi:10.3389/fimmu.2022.1005992)
Supplement: Supplementary file 4 [file Table_3.xlsx]

## Sheet: Sheet0
© 2000-2022 QIAGEN. All rights reserved.
ID	Molecules in Network	Score	Focus Molecules	Top Diseases and Functions
1	26s Proteasome,Actin,ALDH1A1,Alpha tubulin,Ap2b1,ARG1,Atp5e,BGLAP,BIRC5,CPT1B,EEF1E1,EIF4E,FHL3,FUBP1,Histone h3,HSPB3,Ifi27l2a/Ifi27l2b,KCNAB2,LAP3,MYBPC1,NDUFA1,NDUFA5,NDUFV3,Nos1ap,PHKG1,PITHD1,PLK1,PRG2,RAB3D,RETN,RNA polymerase II,RTN4,S100A4,Tpm1,UQCRHL	37	30	[Amino Acid Metabolism, Molecular Transport, Small Molecule Biochemistry]
2	ACAC,ACACB,ACSL1,AFDN,AKAP1,Akt,ALDH3A1,ARNTL,ATP1A1,ATP1A2,Calmodulin,CD93,CLDN4,CNTN2,Col17a1,CPT1,CRAT,DOC2B,EPB41L2,F11R,FASN,LINGO1,Mcpt4,N-cor,NR1D1,PER2,PLIN3,RAB2A,RIT1,S100a7a,SPRR3,SRC (family),STK24,TSG101,TTK	35	29	[Lipid Metabolism, Nucleic Acid Metabolism, Small Molecule Biochemistry]
3	AKR1B10,APLN,ATP1B1,B3GNT2,CCNB1,CMIP,CYP4F22,DLK1,DNM1,DUSP4,E2f,ELOVL4,ERK1/2,GPC1,Hspa1b,KRT19,KRT6B,KRT76,LORICRIN,MAP2K1/2,Mapk,MAPK1,MHC Class II (complex),Pkc(s),PNPLA1,PPP1CA,PPP3R1,SEPTIN2,SEPTIN3,SLC7A10,SLC9A3R1,SUOX,TGM1,UBE2C,VCL	35	29	[Dermatological Diseases and Conditions, Developmental Disorder, Hereditary Disorder]
4	AHSG,BSN,CANX,Clec2d (includes others),CTSE,Dcpp1 (includes others),G protein alphai,GBP6,HLA-A,IFI16,IFIH1,IFIT3,IFN alpha/beta,IFN Beta,Ifnar,IL12 (complex),IL1RAP,IL36A,IL36G,Interferon alpha,IRF7,ISG15,LAMP2,NFkB (complex),OAS1,OAS2,RNASEL,RPSA,SLPI,SPRR1A,STIM1,TAP1,TNK1,USP18,ZBP1	33	28	[Antimicrobial Response, Connective Tissue Disorders, Inflammatory Response]
5	BUB1B,CD3G,CDC20,CDC25C,CENPE,Collagen(s),Cyp4f16/Cyp4f37,CYRIB,EDEM1,FKBP1A,Hif1,HSD11B1,IgG,Ighg2b,IGKC,JAK3,LDHA,Map3k7cl,MHC II,MTORC1,P38 MAPK,p70 S6k,PDK1,POLH,PPP1R3C,PTTG1,RANBP10,RNASET2,RPS2,SELP,SERPINH1,SLC1A5,Tgf beta,Tgtp1/Tgtp2,VASP	31	27	[Cell Cycle, Hereditary Disorder, Reproductive System Development and Function]
6	ACTR2,ADA,AMPK,BCR (complex),BUB1,CD3,CD34,CDC37,CRABP2,CTSD,DHCR24,DMD,DUSP14,EGF,ERK,FBN1,FMO1,GSTA5,Histone h4,Igm,IKK (complex),IRS1,Jnk,KIF5C,MAD2L1,MAP2K1,MT-ND1,NEK7,NLRX1,PI3K (complex),Podxl,PRKAA,S100A10,TCR,TF	25	24	[Cell Morphology, Cell-To-Cell Signaling and Interaction, Connective Tissue Development and Function]
7	ANLN,ATP7A,BUB1B,CCNB1,CCNB2,CCND2,CCND3,EBP,FCGR1A,H1-2,HDAC1,Hnrnpa1,ID1,IL22RA1,LCE3C,LDLR,MLXIPL,MNT,MYC,NASP,PLK1,RBBP4,RETN,RPL3,RPL39,RPS18,RPS26,RPS27L,RPTOR,SIGLEC8,SLC25A31,Sprr2g,TARDBP,TFAP2C,THRB	17	19	[Cancer, Cell Cycle, Connective Tissue Development and Function]
8	CACNB1,DHX15,DHX8,DKKL1,DOCK9,DUSP4,ELOVL1,FGFR2,FIGLA,GATA3,Gm19500,ID1,IL17RB,IL1RAP,IL1RL1,IL2,IRX3,ITK,KNDC1,Lce1b,Lce3a (includes others),LRRC27,NRAS,PDCD1,POU4F1,RAG1,RCN1,SLPI,SPRY2,TAF7L,TCF7L2,TENT5B,TRIM59,USP18,VPS25	17	19	[Hematological Disease, Immunological Disease, Organismal Injury and Abnormalities]
9	AIM2,ALDH1A1,BCAP31,CCL20,CHPT1,CP,CXCL6,ELANE,GNB2,GRN,HDGF,IFNGR1,IL1B,IL36A,IL36RN,KLK14,KNSTRN,Lce3c,MID1,NLRP4,PDK2,Pdlim3,PGAM5,PRSS8,PTGER4,RETN,RNASEL,RNF24,RNF31,RTP4,SCD,SGPP1,SYVN1,TNIP1,TRAP1	16	18	[Cellular Movement, Hematological System Development and Function, Immune Cell Trafficking]
10	ADCY,ADK,ADRB,ANK3,CACNA1C,CARTPT,CDCA3,CENPF,Creb,CYP2E1,DYNLT2B,EP400,FECH,FGF1,GIPR,GSR,GSTA3,GSTM4,HADH,HLA-DOB,HOXA10,IFI16,MEN1,MT-ND3,NEK2,Nr1h,Osteocalcin,PCNA,PLA2G6,POLE,Proinsulin,Rb,SLIT2,TXNRD1,Vmn2r32 (includes others)	14	17	[Organismal Injury and Abnormalities, Renal Damage, Renal Tubule Injury]
11	ADORA2A,AIM2,AP1S1,ATF3,BTK,C3,CCND2,EIF2S2,GBP2,GFAP,GLUL,GSE1,HLA-A,HSP90AA1,IFI44,IFNG,IL21R,ITGA4,KDM1A,LAG3,Lce1l,LYZ,OAS1,PDCD1,PDLIM2,PHF11,PMPCA,PSME1,PYCARD,RAB43,RETN,SAMHD1,SENP3,Slfn2,Ttc39aos1	14	17	[Cellular Function and Maintenance, Endocrine System Disorders, Gastrointestinal Disease]
12	ACACA,ACLY,AHR,ALDH1B1,CCND2,CCND3,Cdc2,CEBPA,CPA3,CPS1,CYP2S1,DHFR,DUOX2,FABP4,FMO2,Gm4737,GSTA5,H4-16,HLA-A,Hsdl2,IGFBP4,LGALSL,NR1I2,NR1I3,NRG4,POR,PTGS1,Ptms,RPS6KA2,SDR9C7,SHB,SLC22A7,SMARCA5,SPNS2,ST13	14	17	[Drug Metabolism, Lipid Metabolism, Small Molecule Biochemistry]
13	ACACB,ACADM,ADIPOR1,ANO2,CACYBP,CSHL1,CYP2E1,DRG1,FGFR2,FKBP3,GAL,GFAP,GRID2,GSTA3,H60b/H60c,Hmga2,HOXA10,IGFBP3,Klrk1,LEP,MAML3,ME1,Mir205hg,OPLAH,PML,PTGER3,RANBP3L,RTN4,Scd2,Setd1b,SETDB1,SLC25A5,SYT17,TREX2,YWHAG	14	17	[Organismal Functions, Organismal Injury and Abnormalities, Tissue Morphology]
14	AKT1,Ces1b/Ces1c,CKAP2,COQ4,CYP19A1,DMRT1,E2F1,EGFR,GATA6,GPR179,GPR27,HYAL1,Jnk,KIFC1,LEP,MDM2,NR5A1,PCNA,POU5F1,QDPR,RAB11FIP1,RELA,SCO2,SDHB,SEC23B,SHROOM3,SMAD3,TMPRSS11D,TP53,TP63,TP73,UBA1,VCAN,VIM,VMP1	13	16	[Cell Cycle, Cellular Development, Cellular Growth and Proliferation]
15	ASPM,CASR,CCNA2,CCNB1,CCNB2,CDKN3,CEBPB,CKAP2L,CKS2,CSF2,DEPDC1,E2F2,FOXM1,Irgm1,ITCH,KAT2A,KIF20A,KIF22,KIF2C,LDLR,N6AMT1,NR1H3,NUSAP1,PTGER2,RMRP,SAE1,SLC15A4,SPAG5,TCF3,TCF4,TPX2,TROAP,VDR,YY1,ZBTB17	13	16	[Cell Cycle, Cellular Development, Cellular Growth and Proliferation]
16	ADIPOR1,ATP6V0A4,CYP2E1,FASLG,GPR84,H2-T10,ID1,IL21,KRT13,MGAT2,mir-127,Mitochondrial complex 1,MTHFD1L,MTLN,NECTIN4,NEIL2,NLRC5,NONG039083,NOS2,PCK2,PDCD1,PDE2A,PDK2,PIMREG,PLA2G6,POU5F1,PTGDR,SIRT1,Slfn2,Tgtp1/Tgtp2,TMPRSS4,TNF,UBA7,VASP,ZNF207	13	16	[Lipid Metabolism, Molecular Transport, Small Molecule Biochemistry]
17	AURKA,CCND2,CDKN1B,CENPA,CLPB,CSNK1D,HSPB8,ID1,INCENP,JPH2,KIF23,Krt10,KRT80,LUC7L2,MACROD2,MACROH2A1,MAP1LC3A,MRRF,MYL2,NEDD9,PAWR,PKD1,POLK,PSAP,PSME3,RBBP4,RUNX1,SLC25A4,SLC8A1,SOX6,TNFRSF13C,TP53,Tpm1,TRA2A,YY1	13	16	[Cell Cycle, Cellular Development, Cellular Growth and Proliferation]
18	ALDH1A1,CAP2,CFL1,CRX,Cyct,DLG4,EOMES,FOXO1,GPR17,GRB14,GUCA1B,GUCY2D,GUCY2F,INSR,KCNAB2,Klra7 (includes others),LIN7C,Meg3,MRPS22,NEFL,NRL,PCDHGC3,PDE6A,PDE6B,PSEN1,RABGEF1,RBP2,RYR2,SACM1L,SLC25A4,TFAP2C,TNNC2,UCHL3,VDAC2,YWHAE	13	16	[Cellular Function and Maintenance, Organ Development, Tissue Development]
19	ANXA11,ATF3,CASP9,CCND2,CHIT1,COA3,CPXM2,DIO2,E2F3,E2F5,FLVCR2,LMX1B,mir-8,MRPL58,MSN,NDUFA2,NR4A2,OTX2,PAX6,PGAM2,Pka,PMPCB,PRKCG,RAB7A,RB1,RGS4,SLC23A3,SMIM3,SPI1,Sprr1b,Srsf5,TBC1D9,TBRG4,TLE3,ZEB1	13	16	[Cell Cycle, Cellular Development, Nervous System Development and Function]
20	ABLIM1,ACHE,ADAMTSL3,AIM2,APEH,Bpifb9a/Bpifb9b,CD8A,COLQ,CRIP1,DAG1,DCTN1,EIF2AK2,FAHD1,GNAO1,GPC4,HDAC11,HINT1,IFNG,JAK1,KIT,KRT73,LARGE1,MALAT1,MKNK1,MMP3,MT-CO1,MT-RNR1,Notch,PRIMA1,SGCA,SMYD1,SSPN,STXBP1,VIPR1,WFDC5	13	16	[Cell Death and Survival, Cell-To-Cell Signaling and Interaction, Small Molecule Biochemistry]
21	APOA1,CBS/CBSL,CYP2A6 (includes others),Cyp2g1,EIF3K,GSTP1,IL10RA,KRT31,KRT83,Krt87,KRTAP13-1,KRTAP2-3/KRTAP2-4,KRTAP26-1,KRTAP3-1,LANCL1,MYO5A,MYRIP,NR1I3,PLA2G10,RAB27A,RORA,RORC,SERPINB12,STAT3,STAT5a/b,STAT5B,TAF4,Tchh,TGM3,TNF,TOP1,TP53,ZFHX3	12	15	[Lipid Metabolism, Organ Morphology, Small Molecule Biochemistry]
22	ABHD5,ACACA,ACADM,AIP,APOA1,ASL,ATF6,CARHSP1,CPT1A,CYP1A1,DECR1,DGAT1,ECI2,ERN1,FABP4,FBXL7,G6PC1,GSDMC,KMT2D,KRT23,LORICRIN,MVD,PCK1,PDE9A,PPARA,PRDX6,Proinsulin,RBP7,RGS7,RIDA,SCD,SLC27A2,SORD,SSR3,TBCB	12	15	[Energy Production, Lipid Metabolism, Small Molecule Biochemistry]
23	ADAMTS2,ADAMTS5,Alpha catenin,BETA TUBULIN,Bvht,CDH13,CFL2,COL6A3,CSRP3,DMD,DTNA,IHH,KRT18,LAMP2,LDB3,LRP6,LYZ,MMP19,Mup1 (includes others),MYH13,NCEH1,NFKBIZ,OBSCN,PLEC,PPARGC1A,PRKAA,RIPOR2,RPGRIP1,RPL3L,SLC46A3,SYNC,SYNE3,SYNM,TCAP,VIM	12	15	[Embryonic Development, Organ Development, Organismal Development]
24	ACAA2,ARNTL,ATF3,BMP1,CLDN23,COL5A2,DNMT3A,EIF4E,EZH2,FGF23,FMR1,FXYD1,GABRA1,GSDMA,JARID2,LAMP1,ME1,Mirg,MRPL12,NFE2L2,P2RY14,PDGFRB,PIK3R2,PLCH1,PSMB3,PTEN,RAB5C,Rian,RNF225,SKP2,SLC5A8,STX1B,SYP,SYT1,VEGFC	12	15	[Cancer, Developmental Disorder, Organismal Injury and Abnormalities]
25	ARHGAP4,BCL10,BTK,CABIN1,Ccl7,CIITA,CKB,CR2,CRCT1,cytokine,DUSP14,EBI3,FASLG,FSD1L,GATA1,H1f4,IL4,Klrk1,LORICRIN,LY6G6C,MAP3K14,Map3k7,NFATC2,NFKB2,PDCD1,PDCD5,PDZD2,RAMP1,RRAD,SH2D1A,SIX2,SPOCK2,WDR62,WNT11,ZFPM1	12	15	[Hematological System Development and Function, Humoral Immune Response, Protein Synthesis]
